# Supplementary material
Source: Springer Nature journal article supplement (https://www.springermedizin.de/resource/supplementary/12955_2011_890_MOESM2_ESM.pdf/9558646)
Supplement: MOESM2 [file 9558646]

764 articles identified through database search (Pubmed, PsychInfo, Embase, Cinahl, Cochrane)

Articles excluded

- 256 duplicate articles
- 290 studies not relevant to topic
- 57 studies were on cancer survivors

161 full text articles were reviewed

Articles excluded

- 85 studies of BCS (< 5 years since initial diagnosis)
- 10 studies used non-English version of questionnaire
- 24 were review studies

42 studies screened for different QoL instruments used in long-term BCS (> 5 years since diagnosis)

58 QoL instruments (from 42 studies screened) were reviewed for their validation in long-term BCS

QoL instruments excluded

46 instruments were validated in general population

12 QoL instruments validated in long-term BCS included

Using these 12 QoL instruments, 19 studies reporting the use of these instruments were included
